# Supplementary material
Source: publisher site journal article supplement (https://www.dovepress.com/article/306242)
Supplement: Supplementary file 1 [file get_supplementary_file.php]

Table S1：Oligonucleotide sequence for qRT-PCR

| Oligo name | Oligonucleotide sequence (5´ to 3´) |
| --- | --- |
| Mouse Gabrb3 F | CTGCTGCCAATCTGGCTTTC |
| Mouse Gabrb3 R | CGTAGCCTTTCAACAGCTTGTC |
| Mouse Drd1 F | ATGGCTCCTAACACTTCTACCA |
| Mouse Drd1 R | GGGTATTCCCTAAGAGAGTGGAC |
| Mouse TLR2 F | TGCTTTCCTGCTGAAGATTT |
| Mouse TLR2 R | TGTACCGCAACAGCTTCAGG |
| Mouse TLR3 F | TTGTCTTCTGCACGAACCTG |
| Mouse TLR3 R | GGCAACGCAAGGATT TTA TT |
| Mouse TLR4 F | ACC TGG CTG GTT TAC ACG TC |
| Mouse TLR4 R | GTG CCA GAG ACA TTG CAG AA |
| Mouse HMGB1 F | CCA TTG GTG ATG TTG CAA AG |
| Mouse HMGB1 R | CTT TTT CGC TGC ATC AGG TT |
| Mouse TNFα F | GACGTGGAACTGGCAGAAGAG |
| Mouse TNFα R | TTGGTGGTTTGTGAGTGTGAG |
| Mouse IL-1β F | GCAACTGTTCCTGAACTCAACT |
| Mouse IL-1β R | ATCTTTTGGGGTCCGTCAACT |
| Mouse β-actin F | GTA TGA CTC CAC TCA CGG CAA A |
| Mouse β-actin R | GGT CTC GCT CCT GGA AGA TG |

Table S2：Supplementary-Overlapping DEGs from PFC and striatum-Kegg

| **Pathway Name** | **Pathway ID** | **Pvalue** | **Pvalue_adjusted** | **Genes** | **Count** | **Pop Hit** | **List_Total** | **Background Genes** | **First class** | **Secondary class** |
| --- | --- | --- | --- | --- | --- | --- | --- | --- | --- | --- |
| Morphine addiction | mmu05032 | 0.00063 | 0.0107 | Gabrb3|1;Drd1|1 | 2 | 91 | 4 | 8774 | Human Diseases | Substance dependence |
| Neuroactive ligand-receptor interaction | mmu04080 | 0.00903 | 0.0755 | Gabrb3|1;Drd1|1 | 2 | 350 | 4 | 8774 | Environmental Information Processing | Signaling molecules and interaction |
| Nicotine addiction | mmu05033 | 0.0181 | 0.0755 | Gabrb3|1 | 1 | 40 | 4 | 8774 | Human Diseases | Substance dependence |
| Cocaine addiction | mmu05030 | 0.0217 | 0.0755 | Drd1|1 | 1 | 48 | 4 | 8774 | Human Diseases | Substance dependence |
| Amphetamine addiction | mmu05031 | 0.0311 | 0.0755 | Drd1|1 | 1 | 69 | 4 | 8774 | Human Diseases | Substance dependence |
| Arrhythmogenic right ventricular cardiomyopathy (ARVC) | mmu05412 | 0.0347 | 0.0755 | Dsp|1 | 1 | 77 | 4 | 8774 | - | - |
| Gap junction | mmu04540 | 0.0386 | 0.0755 | Drd1|1 | 1 | 86 | 4 | 8774 | Cellular Processes | Cellular community - eukaryotes |
| Arachidonic acid metabolism | mmu00590 | 0.04 | 0.0755 | Ptgds|1 | 1 | 89 | 4 | 8774 | Metabolism | Lipid metabolism |
| GABAergic synapse | mmu04727 | 0.04 | 0.0755 | Gabrb3|1 | 1 | 89 | 4 | 8774 | Organismal Systems | Nervous system |
| Serotonergic synapse | mmu04726 | 0.0584 | 0.093 | Gabrb3|1 | 1 | 131 | 4 | 8774 | Organismal Systems | Nervous system |
| Dopaminergic synapse | mmu04728 | 0.0601 | 0.093 | Drd1|1 | 1 | 135 | 4 | 8774 | Organismal Systems | Nervous system |
| Retrograde endocannabinoid signaling | mmu04723 | 0.0658 | 0.0932 | Gabrb3|1 | 1 | 148 | 4 | 8774 | Organismal Systems | Nervous system |
| Calcium signaling pathway | mmu04020 | 0.0847 | 0.107 | Drd1|1 | 1 | 192 | 4 | 8774 | Environmental Information Processing | Signal transduction |
| Alcoholism | mmu05034 | 0.0885 | 0.107 | Drd1|1 | 1 | 201 | 4 | 8774 | Human Diseases | Substance dependence |
| cAMP signaling pathway | mmu04024 | 0.0945 | 0.107 | Drd1|1 | 1 | 215 | 4 | 8774 | Environmental Information Processing | Signal transduction |
| Parkinson disease | mmu05012 | 0.108 | 0.115 | Drd1|1 | 1 | 247 | 4 | 8774 | Human Diseases | Neurodegenerative disease |
| Metabolic pathways | mmu01100 | 0.542 | 0.542 | Ptgds|1 | 1 | 1555 | 4 | 8774 | Metabolism | Global and overview maps |

Table S3：Supplementary-PFC-Kegg

| **Pathway Name** | **Pathway ID** | **Pvalue** | **Pvalue_adjusted** | **Genes** | **Count** | **Pop Hit** | **List_Total** | **Background Genes** | **First class** | **Secondary class** |
| --- | --- | --- | --- | --- | --- | --- | --- | --- | --- | --- |
| Morphine addiction | mmu05032 | 0.000000201 | 0.0000237 | Gng4|1;Gabra3|1;Pde1b|1;Gng2|1;Gabrb3|1;Gabra5|1;Gng7|1;Drd1|1;Pde10a|1 | 9 | 91 | 85 | 8774 | Human Diseases | Substance dependence |
| Amphetamine addiction | mmu05031 | 0.000000287 | 0.0000237 | Arc|1;Stx1a|1;Fos|1;Ppp3ca|1;Ppp1r1b|1;Jun|1;Gria1|1;Drd1|1 | 8 | 69 | 85 | 8774 | Human Diseases | Substance dependence |
| Dopaminergic synapse | mmu04728 | 0.000000625 | 0.0000344 | Gng4|1;Fos|1;Drd2|1;Ppp3ca|1;Plcb1|1;Gng2|1;Ppp1r1b|1;Gria1|1;Gng7|1;Drd1|1 | 10 | 135 | 85 | 8774 | Organismal Systems | Nervous system |
| Retrograde endocannabinoid signaling | mmu04723 | 0.0000871 | 0.00303 | Gng4|1;Gabra3|1;Plcb1|1;Gng2|1;Gabrb3|1;Gria1|1;Gabra5|1;Gng7|1 | 8 | 148 | 85 | 8774 | Organismal Systems | Nervous system |
| Cocaine addiction | mmu05030 | 0.0000935 | 0.00303 | Drd2|1;Ppp1r1b|1;Jun|1;Rgs9|1;Drd1|1 | 5 | 48 | 85 | 8774 | Human Diseases | Substance dependence |
| Oxytocin signaling pathway | mmu04921 | 0.00011 | 0.00303 | Cacnb3|1;Camk1|1;Fos|1;Mef2c|1;Cacna2d3|1;Ppp3ca|1;Plcb1|1;Jun|1 | 8 | 153 | 85 | 8774 | Organismal Systems | Endocrine system |
| GABAergic synapse | mmu04727 | 0.000212 | 0.00499 | Gng4|1;Gabra3|1;Gng2|1;Gabrb3|1;Gabra5|1;Gng7|1 | 6 | 89 | 85 | 8774 | Organismal Systems | Nervous system |
| Glycerolipid metabolism | mmu00561 | 0.000295 | 0.00607 | Dgkz|1;Lpl|1;Dgkb|1;Dgat2|1;Dgkg|1 | 5 | 61 | 85 | 8774 | Metabolism | Lipid metabolism |
| Circadian entrainment | mmu04713 | 0.000357 | 0.00655 | Gng4|1;Fos|1;Plcb1|1;Gng2|1;Gria1|1;Gng7|1 | 6 | 98 | 85 | 8774 | Organismal Systems | Environmental adaptation |
| Nicotine addiction | mmu05033 | 0.000575 | 0.00892 | Gabra3|1;Gabrb3|1;Gria1|1;Gabra5|1 | 4 | 40 | 85 | 8774 | Human Diseases | Substance dependence |
| Human T-cell leukemia virus 1 infection | mmu05166 | 0.000594 | 0.00892 | Egr2|1;H2-D1|1;Egr1|1;Fos|1;Nrp1|1;Ppp3ca|1;Pole4|1;Tgfb2|1;Jun|1 | 9 | 246 | 85 | 8774 | - | - |
| Alcoholism | mmu05034 | 0.000701 | 0.00964 | Gng4|1;Crh|1;Npy|1;Drd2|1;Gng2|1;Ppp1r1b|1;Gng7|1;Drd1|1 | 8 | 201 | 85 | 8774 | Human Diseases | Substance dependence |
| Glutamatergic synapse | mmu04724 | 0.000765 | 0.0097 | Gng4|1;Ppp3ca|1;Plcb1|1;Gng2|1;Gria1|1;Gng7|1 | 6 | 113 | 85 | 8774 | Organismal Systems | Nervous system |
| Choline metabolism in cancer | mmu05231 | 0.00254 | 0.028 | Fos|1;Dgkz|1;Dgkb|1;Dgkg|1;Jun|1 | 5 | 98 | 85 | 8774 | Human Diseases | Cancers: Overview |
| Phosphatidylinositol signaling system | mmu04070 | 0.00254 | 0.028 | Mtm1|1;Dgkz|1;Plcb1|1;Dgkb|1;Dgkg|1 | 5 | 98 | 85 | 8774 | Environmental Information Processing | Signal transduction |
| AGE-RAGE signaling pathway in diabetic complications | mmu04933 | 0.0029 | 0.0299 | Thbd|1;Egr1|1;Plcb1|1;Tgfb2|1;Jun|1 | 5 | 101 | 85 | 8774 | - | - |
| Cholinergic synapse | mmu04725 | 0.00452 | 0.0413 | Gng4|1;Fos|1;Plcb1|1;Gng2|1;Gng7|1 | 5 | 112 | 85 | 8774 | Organismal Systems | Nervous system |
| cAMP signaling pathway | mmu04024 | 0.00471 | 0.0413 | Fos|1;Npy|1;Drd2|1;Ppp1r1b|1;Jun|1;Gria1|1;Drd1|1 | 7 | 215 | 85 | 8774 | Environmental Information Processing | Signal transduction |
| Hepatitis B | mmu05161 | 0.00475 | 0.0413 | Egr2|1;Egr3|1;Fos|1;Tgfb2|1;Jun|1;Ywhaq|1 | 6 | 162 | 85 | 8774 | Human Diseases | Infectious diseases: Viral |
| Arrhythmogenic right ventricular cardiomyopathy (ARVC) | mmu05412 | 0.00649 | 0.0536 | Cacnb3|1;Cacna2d3|1;Pkp2|1;Dsp|1 | 4 | 77 | 85 | 8774 | Human Diseases | Cardiovascular diseases |
| MAPK signaling pathway | mmu04010 | 0.00744 | 0.0584 | Cacnb3|1;Fos|1;Nlk|1;Mef2c|1;Cacna2d3|1;Ppp3ca|1;Tgfb2|1;Jun|1 | 8 | 294 | 85 | 8774 | Environmental Information Processing | Signal transduction |
| Axon guidance | mmu04360 | 0.00787 | 0.059 | Ephb6|1;Nrp1|1;Epha7|1;Dcc|1;Ppp3ca|1;Sema3e|1 | 6 | 180 | 85 | 8774 | Organismal Systems | Development |
| Serotonergic synapse | mmu04726 | 0.0087 | 0.0624 | Gng4|1;Plcb1|1;Gng2|1;Gabrb3|1;Gng7|1 | 5 | 131 | 85 | 8774 | Organismal Systems | Nervous system |
| Colorectal cancer | mmu05210 | 0.0103 | 0.0681 | Fos|1;Dcc|1;Tgfb2|1;Jun|1 | 4 | 88 | 85 | 8774 | Human Diseases | Cancers: Specific types |
| Taste transduction | mmu04742 | 0.0103 | 0.0681 | Gabra3|1;Kcnb1|1;Pde1b|1;Gabra5|1 | 4 | 88 | 85 | 8774 | Organismal Systems | Sensory system |
| Hypertrophic cardiomyopathy (HCM) | mmu05410 | 0.0116 | 0.0735 | Cacnb3|1;Tnnc1|1;Cacna2d3|1;Tgfb2|1 | 4 | 91 | 85 | 8774 | Human Diseases | Cardiovascular diseases |
| Dilated cardiomyopathy (DCM) | mmu05414 | 0.0129 | 0.079 | Cacnb3|1;Tnnc1|1;Cacna2d3|1;Tgfb2|1 | 4 | 94 | 85 | 8774 | Human Diseases | Cardiovascular diseases |
| Adrenergic signaling in cardiomyocytes | mmu04261 | 0.0158 | 0.0931 | Cacnb3|1;Tnnc1|1;Cacna2d3|1;Plcb1|1;Scn4b|1 | 5 | 152 | 85 | 8774 | Organismal Systems | Circulatory system |
| Chagas disease (American trypanosomiasis) | mmu05142 | 0.017 | 0.0967 | Fos|1;Plcb1|1;Tgfb2|1;Jun|1 | 4 | 102 | 85 | 8774 | Human Diseases | Infectious diseases: Parasitic |
| Amyotrophic lateral sclerosis (ALS) | mmu05014 | 0.0185 | 0.102 | Nefm|1;Ppp3ca|1;Gria1|1 | 3 | 58 | 85 | 8774 | Human Diseases | Neurodegenerative diseases |
| Long-term depression | mmu04730 | 0.0202 | 0.108 | Crh|1;Plcb1|1;Gria1|1 | 3 | 60 | 85 | 8774 | Organismal Systems | Nervous system |
| Long-term potentiation | mmu04720 | 0.027 | 0.139 | Ppp3ca|1;Plcb1|1;Gria1|1 | 3 | 67 | 85 | 8774 | Organismal Systems | Nervous system |
| Renal cell carcinoma | mmu05211 | 0.028 | 0.14 | Tgfa|1;Tgfb2|1;Jun|1 | 3 | 68 | 85 | 8774 | Human Diseases | Cancers: Specific types |
| Leishmaniasis | mmu05140 | 0.0291 | 0.141 | Fos|1;Tgfb2|1;Jun|1 | 3 | 69 | 85 | 8774 | Human Diseases | Infectious diseases: Parasitic |
| Pathways in cancer | mmu05200 | 0.0348 | 0.162 | Gng4|1;Fos|1;Dcc|1;Plcb1|1;Gng2|1;Tgfa|1;Tgfb2|1;Jun|1;Rarb|1;Gng7|1 | 10 | 539 | 85 | 8774 | Human Diseases | Cancers: Overview |
| Osteoclast differentiation | mmu04380 | 0.0354 | 0.162 | Fos|1;Ppp3ca|1;Tgfb2|1;Jun|1 | 4 | 128 | 85 | 8774 | Organismal Systems | Development |
| Renin secretion | mmu04924 | 0.0372 | 0.166 | Ppp3ca|1;Plcb1|1;Pde1b|1 | 3 | 76 | 85 | 8774 | - | - |
| Calcium signaling pathway | mmu04020 | 0.0383 | 0.166 | Tnnc1|1;Ppp3ca|1;Plcb1|1;Pde1b|1;Drd1|1 | 5 | 192 | 85 | 8774 | Environmental Information Processing | Signal transduction |
| B cell receptor signaling pathway | mmu04662 | 0.0436 | 0.185 | Fos|1;Ppp3ca|1;Jun|1 | 3 | 81 | 85 | 8774 | Organismal Systems | Immune system |
| Gap junction | mmu04540 | 0.0506 | 0.196 | Drd2|1;Plcb1|1;Drd1|1 | 3 | 86 | 85 | 8774 | Cellular Processes | Cellular community |
| Rheumatoid arthritis | mmu05323 | 0.0506 | 0.196 | Fos|1;Tgfb2|1;Jun|1 | 3 | 86 | 85 | 8774 | Human Diseases | Immune diseases |
| Cardiac muscle contraction | mmu04260 | 0.052 | 0.196 | Cacnb3|1;Tnnc1|1;Cacna2d3|1 | 3 | 87 | 85 | 8774 | Organismal Systems | Circulatory system |
| Aldosterone-regulated sodium reabsorption | mmu04960 | 0.0521 | 0.196 | Sgk1|1;Nr3c2|1 | 2 | 38 | 85 | 8774 | Organismal Systems | Excretory system |
| Neuroactive ligand-receptor interaction | mmu04080 | 0.0525 | 0.196 | Gabra3|1;Drd2|1;Gabrb3|1;Gria1|1;Gabra5|1;Npy2r|1;Drd1|1 | 7 | 350 | 85 | 8774 | Environmental Information Processing | Signaling molecules and interaction |
| PPAR signaling pathway | mmu03320 | 0.0535 | 0.196 | Fabp7|1;Lpl|1;Scd2|1 | 3 | 88 | 85 | 8774 | Organismal Systems | Endocrine system |
| Phospholipase D signaling pathway | mmu04072 | 0.0563 | 0.202 | Dgkz|1;Plcb1|1;Dgkb|1;Dgkg|1 | 4 | 149 | 85 | 8774 | - | - |
| Glycerophospholipid metabolism | mmu00564 | 0.0693 | 0.24 | Dgkz|1;Dgkb|1;Dgkg|1 | 3 | 98 | 85 | 8774 | Metabolism | Lipid metabolism |
| Wnt signaling pathway | mmu04310 | 0.0719 | 0.24 | Nlk|1;Ppp3ca|1;Plcb1|1;Jun|1 | 4 | 162 | 85 | 8774 | Environmental Information Processing | Signal transduction |
| Viral carcinogenesis | mmu05203 | 0.072 | 0.24 | Egr2|1;H2-D1|1;Egr3|1;Jun|1;Ywhaq|1 | 5 | 230 | 85 | 8774 | Human Diseases | Cancers: Overview |
| Aldosterone synthesis and secretion | mmu04925 | 0.0727 | 0.24 | Camk1|1;Plcb1|1;Nr4a2|1 | 3 | 100 | 85 | 8774 | - | - |
| Ether lipid metabolism | mmu00565 | 0.0758 | 0.245 | Ugt8|1;Enpp2|1 | 2 | 47 | 85 | 8774 | Metabolism | Lipid metabolism |
| T cell receptor signaling pathway | mmu04660 | 0.0779 | 0.247 | Fos|1;Ppp3ca|1;Jun|1 | 3 | 103 | 85 | 8774 | Organismal Systems | Immune system |
| Inflammatory bowel disease (IBD) | mmu05321 | 0.115 | 0.357 | Tgfb2|1;Jun|1 | 2 | 60 | 85 | 8774 | Human Diseases | Immune diseases |
| Chemokine signaling pathway | mmu04062 | 0.122 | 0.373 | Gng4|1;Plcb1|1;Gng2|1;Gng7|1 | 4 | 196 | 85 | 8774 | Organismal Systems | Immune system |
| FoxO signaling pathway | mmu04068 | 0.134 | 0.4 | Nlk|1;Tgfb2|1;Sgk1|1 | 3 | 131 | 85 | 8774 | Environmental Information Processing | Signal transduction |
| Glycosphingolipid biosynthesis - ganglio series | mmu00604 | 0.136 | 0.4 | St6galnac5|1 | 1 | 15 | 85 | 8774 | Metabolism | Glycan biosynthesis and metabolism |
| Estrogen signaling pathway | mmu04915 | 0.14 | 0.4 | Fos|1;Plcb1|1;Jun|1 | 3 | 134 | 85 | 8774 | Organismal Systems | Endocrine system |
| Non-small cell lung cancer | mmu05223 | 0.141 | 0.4 | Tgfa|1;Rarb|1 | 2 | 68 | 85 | 8774 | Human Diseases | Cancers: Specific types |
| Purine metabolism | mmu00230 | 0.145 | 0.405 | Pde1b|1;Pole4|1;Pde10a|1 | 3 | 136 | 85 | 8774 | Metabolism | Nucleotide metabolism |
| Adherens junction | mmu04520 | 0.151 | 0.413 | Nlk|1;Lmo7|1 | 2 | 71 | 85 | 8774 | Cellular Processes | Cellular community |
| Nitrogen metabolism | mmu00910 | 0.153 | 0.413 | Ca2|1 | 1 | 17 | 85 | 8774 | Metabolism | Energy metabolism |
| Inositol phosphate metabolism | mmu00562 | 0.157 | 0.419 | Mtm1|1;Plcb1|1 | 2 | 73 | 85 | 8774 | Metabolism | Carbohydrate metabolism |
| Gastric acid secretion | mmu04971 | 0.164 | 0.426 | Plcb1|1;Ca2|1 | 2 | 75 | 85 | 8774 | Organismal Systems | Digestive system |
| Pertussis | mmu05133 | 0.168 | 0.426 | Fos|1;Jun|1 | 2 | 76 | 85 | 8774 | Human Diseases | Infectious diseases: Bacterial |
| Pancreatic cancer | mmu05212 | 0.168 | 0.426 | Tgfa|1;Tgfb2|1 | 2 | 76 | 85 | 8774 | Human Diseases | Cancers: Specific types |
| Proximal tubule bicarbonate reclamation | mmu04964 | 0.193 | 0.474 | Ca2|1 | 1 | 22 | 85 | 8774 | Organismal Systems | Excretory system |
| Hippo signaling pathway | mmu04390 | 0.195 | 0.474 | Wwc1|1;Tgfb2|1;Ywhaq|1 | 3 | 157 | 85 | 8774 | Environmental Information Processing | Signal transduction |
| ErbB signaling pathway | mmu04012 | 0.195 | 0.474 | Tgfa|1;Jun|1 | 2 | 84 | 85 | 8774 | Environmental Information Processing | Signal transduction |
| Insulin secretion | mmu04911 | 0.203 | 0.484 | Stx1a|1;Plcb1|1 | 2 | 86 | 85 | 8774 | Organismal Systems | Endocrine system |
| GnRH signaling pathway | mmu04912 | 0.217 | 0.505 | Plcb1|1;Jun|1 | 2 | 90 | 85 | 8774 | Organismal Systems | Endocrine system |
| Parkinson disease | mmu05012 | 0.217 | 0.505 | Pink1|1;Drd2|1;Gpr37|1;Drd1|1 | 4 | 247 | 85 | 8774 | - | - |
| Collecting duct acid secretion | mmu04966 | 0.231 | 0.511 | Ca2|1 | 1 | 27 | 85 | 8774 | Organismal Systems | Excretory system |
| Phototransduction | mmu04744 | 0.231 | 0.511 | Rgs9|1 | 1 | 27 | 85 | 8774 | Organismal Systems | Sensory system |
| Hippo signaling pathway - multiple species | mmu04392 | 0.231 | 0.511 | Wwc1|1 | 1 | 27 | 85 | 8774 | - | - |
| Cell adhesion molecules (CAMs) | mmu04514 | 0.233 | 0.511 | Nrcam|1;H2-D1|1;Cldn11|1 | 3 | 172 | 85 | 8774 | Environmental Information Processing | Signaling molecules and interaction |
| cGMP-PKG signaling pathway | mmu04022 | 0.235 | 0.511 | Mef2c|1;Ppp3ca|1;Plcb1|1 | 3 | 173 | 85 | 8774 | Environmental Information Processing | Signal transduction |
| Toll-like receptor signaling pathway | mmu04620 | 0.249 | 0.534 | Fos|1;Jun|1 | 2 | 99 | 85 | 8774 | Organismal Systems | Immune system |
| Circadian rhythm | mmu04710 | 0.254 | 0.535 | Rorb|1 | 1 | 30 | 85 | 8774 | Organismal Systems | Environmental adaptation |
| PI3K-Akt signaling pathway | mmu04151 | 0.26 | 0.535 | Gng4|1;Gng2|1;Sgk1|1;Gng7|1;Ywhaq|1 | 5 | 355 | 85 | 8774 | Environmental Information Processing | Signal transduction |
| Endocytosis | mmu04144 | 0.266 | 0.535 | H2-D1|1;Tgfb2|1;Wipf3|1;Arpc5|1 | 4 | 270 | 85 | 8774 | Cellular Processes | Transport and catabolism |
| Glucagon signaling pathway | mmu04922 | 0.267 | 0.535 | Ppp3ca|1;Plcb1|1 | 2 | 104 | 85 | 8774 | Organismal Systems | Endocrine system |
| Biosynthesis of unsaturated fatty acids | mmu01040 | 0.268 | 0.535 | Scd2|1 | 1 | 32 | 85 | 8774 | Metabolism | Lipid metabolism |
| SNARE interactions in vesicular transport | mmu04130 | 0.275 | 0.535 | Stx1a|1 | 1 | 33 | 85 | 8774 | Genetic Information Processing | Folding, sorting and degradation |
| Amoebiasis | mmu05146 | 0.278 | 0.535 | Plcb1|1;Tgfb2|1 | 2 | 107 | 85 | 8774 | Human Diseases | Infectious diseases: Parasitic |
| Pancreatic secretion | mmu04972 | 0.281 | 0.535 | Plcb1|1;Ca2|1 | 2 | 108 | 85 | 8774 | Organismal Systems | Digestive system |
| Base excision repair | mmu03410 | 0.282 | 0.535 | Pole4|1 | 1 | 34 | 85 | 8774 | Genetic Information Processing | Replication and repair |
| Prion diseases | mmu05020 | 0.282 | 0.535 | Egr1|1 | 1 | 34 | 85 | 8774 | Human Diseases | Neurodegenerative diseases |
| DNA replication | mmu03030 | 0.289 | 0.542 | Pole4|1 | 1 | 35 | 85 | 8774 | Genetic Information Processing | Replication and repair |
| TNF signaling pathway | mmu04668 | 0.299 | 0.555 | Fos|1;Jun|1 | 2 | 113 | 85 | 8774 | Environmental Information Processing | Signal transduction |
| African trypanosomiasis | mmu05143 | 0.31 | 0.562 | Plcb1|1 | 1 | 38 | 85 | 8774 | Human Diseases | Infectious diseases: Parasitic |
| Pyruvate metabolism | mmu00620 | 0.31 | 0.562 | Glo1|1 | 1 | 38 | 85 | 8774 | Metabolism | Carbohydrate metabolism |
| Natural killer cell mediated cytotoxicity | mmu04650 | 0.314 | 0.563 | H2-D1|1;Ppp3ca|1 | 2 | 117 | 85 | 8774 | Organismal Systems | Immune system |
| Oocyte meiosis | mmu04114 | 0.321 | 0.567 | Ppp3ca|1;Ywhaq|1 | 2 | 119 | 85 | 8774 | Cellular Processes | Cell growth and death |
| Glycine, serine and threonine metabolism | mmu00260 | 0.323 | 0.567 | Phgdh|1 | 1 | 40 | 85 | 8774 | Metabolism | Amino acid metabolism |
| Cell cycle | mmu04110 | 0.335 | 0.578 | Tgfb2|1;Ywhaq|1 | 2 | 123 | 85 | 8774 | Cellular Processes | Cell growth and death |
| Fat digestion and absorption | mmu04975 | 0.336 | 0.578 | Dgat2|1 | 1 | 42 | 85 | 8774 | Organismal Systems | Digestive system |
| Nucleotide excision repair | mmu03420 | 0.343 | 0.578 | Pole4|1 | 1 | 43 | 85 | 8774 | Genetic Information Processing | Replication and repair |
| Rap1 signaling pathway | mmu04015 | 0.343 | 0.578 | Sipa1l1|1;Drd2|1;Plcb1|1 | 3 | 214 | 85 | 8774 | Environmental Information Processing | Signal transduction |
| Salmonella infection | mmu05132 | 0.359 | 0.599 | Fos|1;Jun|1;Arpc5|1 | 3 | 220 | 85 | 8774 | Human Diseases | Infectious diseases: Bacterial |
| Sphingolipid metabolism | mmu00600 | 0.374 | 0.616 | Ugt8|1 | 1 | 48 | 85 | 8774 | Metabolism | Lipid metabolism |
| Epstein-Barr virus infection | mmu05169 | 0.381 | 0.616 | H2-D1|1;Jun|1;Ywhaq|1 | 3 | 228 | 85 | 8774 | Human Diseases | Infectious diseases: Viral |
| Apoptosis | mmu04210 | 0.381 | 0.616 | Fos|1;Jun|1 | 2 | 136 | 85 | 8774 | Cellular Processes | Cell growth and death |
| Ras signaling pathway | mmu04014 | 0.391 | 0.627 | Gng4|1;Gng2|1;Gng7|1 | 3 | 232 | 85 | 8774 | Environmental Information Processing | Signal transduction |
| Hedgehog signaling pathway | mmu04340 | 0.398 | 0.632 | Gpr161|1 | 1 | 52 | 85 | 8774 | Environmental Information Processing | Signal transduction |
| Malaria | mmu05144 | 0.421 | 0.656 | Tgfb2|1 | 1 | 56 | 85 | 8774 | Human Diseases | Infectious diseases: Parasitic |
| Regulation of lipolysis in adipocytes | mmu04923 | 0.421 | 0.656 | Npy|1 | 1 | 56 | 85 | 8774 | - | - |
| VEGF signaling pathway | mmu04370 | 0.432 | 0.661 | Ppp3ca|1 | 1 | 58 | 85 | 8774 | Environmental Information Processing | Signal transduction |
| Pyrimidine metabolism | mmu00240 | 0.432 | 0.661 | Pole4|1 | 1 | 58 | 85 | 8774 | Metabolism | Nucleotide metabolism |
| Endocrine and other factor-regulated calcium reabsorption | mmu04961 | 0.443 | 0.671 | Plcb1|1 | 1 | 60 | 85 | 8774 | Organismal Systems | Excretory system |
| Fatty acid metabolism | mmu01212 | 0.449 | 0.673 | Scd2|1 | 1 | 61 | 85 | 8774 | Metabolism | Global and overview maps |
| Allograft rejection | mmu05330 | 0.46 | 0.683 | H2-D1|1 | 1 | 63 | 85 | 8774 | Human Diseases | Immune diseases |
| Graft-versus-host disease | mmu05332 | 0.47 | 0.693 | H2-D1|1 | 1 | 65 | 85 | 8774 | Human Diseases | Immune diseases |
| Type I diabetes mellitus | mmu04940 | 0.495 | 0.705 | H2-D1|1 | 1 | 70 | 85 | 8774 | Human Diseases | Endocrine and metabolic diseases |
| Adipocytokine signaling pathway | mmu04920 | 0.5 | 0.705 | Npy|1 | 1 | 71 | 85 | 8774 | Organismal Systems | Endocrine system |
| Bile secretion | mmu04976 | 0.505 | 0.705 | Ca2|1 | 1 | 72 | 85 | 8774 | Organismal Systems | Digestive system |
| Prolactin signaling pathway | mmu04917 | 0.505 | 0.705 | Fos|1 | 1 | 72 | 85 | 8774 | Organismal Systems | Endocrine system |
| Bacterial invasion of epithelial cells | mmu05100 | 0.51 | 0.705 | Arpc5|1 | 1 | 73 | 85 | 8774 | Human Diseases | Infectious diseases: Bacterial |
| Glioma | mmu05214 | 0.515 | 0.705 | Tgfa|1 | 1 | 74 | 85 | 8774 | Human Diseases | Cancers: Specific types |
| Thyroid hormone synthesis | mmu04918 | 0.515 | 0.705 | Plcb1|1 | 1 | 74 | 85 | 8774 | Organismal Systems | Endocrine system |
| Tuberculosis | mmu05152 | 0.518 | 0.705 | Ppp3ca|1;Tgfb2|1 | 2 | 178 | 85 | 8774 | Human Diseases | Infectious diseases: Bacterial |
| Chronic myeloid leukemia | mmu05220 | 0.524 | 0.705 | Tgfb2|1 | 1 | 76 | 85 | 8774 | Human Diseases | Cancers: Specific types |
| Synaptic vesicle cycle | mmu04721 | 0.529 | 0.705 | Stx1a|1 | 1 | 77 | 85 | 8774 | Organismal Systems | Nervous system |
| Biosynthesis of amino acids | mmu01230 | 0.529 | 0.705 | Phgdh|1 | 1 | 77 | 85 | 8774 | Metabolism | Global and overview maps |
| Autoimmune thyroid disease | mmu05320 | 0.534 | 0.705 | H2-D1|1 | 1 | 78 | 85 | 8774 | Human Diseases | Immune diseases |
| Transcriptional misregulation in cancer | mmu05202 | 0.536 | 0.705 | Pbx1|1;Mef2c|1 | 2 | 184 | 85 | 8774 | Human Diseases | Cancers: Overview |
| Salivary secretion | mmu04970 | 0.538 | 0.705 | Plcb1|1 | 1 | 79 | 85 | 8774 | Organismal Systems | Digestive system |
| Viral myocarditis | mmu05416 | 0.577 | 0.744 | H2-D1|1 | 1 | 88 | 85 | 8774 | Human Diseases | Cardiovascular diseases |
| Arachidonic acid metabolism | mmu00590 | 0.581 | 0.744 | Ptgds|1 | 1 | 89 | 85 | 8774 | Metabolism | Lipid metabolism |
| Fc gamma R-mediated phagocytosis | mmu04666 | 0.581 | 0.744 | Arpc5|1 | 1 | 89 | 85 | 8774 | Organismal Systems | Immune system |
| Antigen processing and presentation | mmu04612 | 0.59 | 0.747 | H2-D1|1 | 1 | 91 | 85 | 8774 | Organismal Systems | Immune system |
| Small cell lung cancer | mmu05222 | 0.594 | 0.747 | Rarb|1 | 1 | 92 | 85 | 8774 | Human Diseases | Cancers: Specific types |
| Complement and coagulation cascades | mmu04610 | 0.598 | 0.747 | Thbd|1 | 1 | 93 | 85 | 8774 | Organismal Systems | Immune system |
| TGF-beta signaling pathway | mmu04350 | 0.605 | 0.751 | Tgfb2|1 | 1 | 95 | 85 | 8774 | Environmental Information Processing | Signal transduction |
| Prostate cancer | mmu05215 | 0.621 | 0.757 | Tgfa|1 | 1 | 99 | 85 | 8774 | Human Diseases | Cancers: Specific types |
| Regulation of actin cytoskeleton | mmu04810 | 0.623 | 0.757 | Iqgap2|1;Arpc5|1 | 2 | 216 | 85 | 8774 | Cellular Processes | Cell motility |
| Melanogenesis | mmu04916 | 0.624 | 0.757 | Plcb1|1 | 1 | 100 | 85 | 8774 | Organismal Systems | Endocrine system |
| Toxoplasmosis | mmu05145 | 0.653 | 0.786 | Tgfb2|1 | 1 | 108 | 85 | 8774 | Human Diseases | Infectious diseases: Parasitic |
| Leukocyte transendothelial migration | mmu04670 | 0.679 | 0.805 | Cldn11|1 | 1 | 116 | 85 | 8774 | Organismal Systems | Immune system |
| Carbon metabolism | mmu01200 | 0.692 | 0.805 | Phgdh|1 | 1 | 120 | 85 | 8774 | Metabolism | Global and overview maps |
| Thyroid hormone signaling pathway | mmu04919 | 0.692 | 0.805 | Plcb1|1 | 1 | 120 | 85 | 8774 | Organismal Systems | Endocrine system |
| Neurotrophin signaling pathway | mmu04722 | 0.695 | 0.805 | Jun|1 | 1 | 121 | 85 | 8774 | Organismal Systems | Nervous system |
| Alzheimer disease | mmu05010 | 0.698 | 0.805 | Ppp3ca|1;Plcb1|1;Lpl|1 | 3 | 368 | 85 | 8774 | - | - |
| Platelet activation | mmu04611 | 0.704 | 0.805 | Plcb1|1 | 1 | 124 | 85 | 8774 | Organismal Systems | Immune system |
| Sphingolipid signaling pathway | mmu04071 | 0.704 | 0.805 | Plcb1|1 | 1 | 124 | 85 | 8774 | Environmental Information Processing | Signal transduction |
| AMPK signaling pathway | mmu04152 | 0.709 | 0.805 | Scd2|1 | 1 | 126 | 85 | 8774 | Environmental Information Processing | Signal transduction |
| Inflammatory mediator regulation of TRP channels | mmu04750 | 0.712 | 0.805 | Plcb1|1 | 1 | 127 | 85 | 8774 | Organismal Systems | Sensory system |
| Lysosome | mmu04142 | 0.723 | 0.812 | Ap1s2|1 | 1 | 131 | 85 | 8774 | Cellular Processes | Transport and catabolism |
| Vascular smooth muscle contraction | mmu04270 | 0.747 | 0.83 | Plcb1|1 | 1 | 140 | 85 | 8774 | Organismal Systems | Circulatory system |
| Insulin signaling pathway | mmu04910 | 0.749 | 0.83 | Prkar1b|1 | 1 | 141 | 85 | 8774 | Organismal Systems | Endocrine system |
| Ubiquitin mediated proteolysis | mmu04120 | 0.754 | 0.83 | Klhl13|1 | 1 | 143 | 85 | 8774 | Genetic Information Processing | Folding, sorting and degradation |
| Non-alcoholic fatty liver disease (NAFLD) | mmu04932 | 0.771 | 0.84 | Jun|1 | 1 | 150 | 85 | 8774 | Human Diseases | Endocrine and metabolic diseases |
| Hepatitis C | mmu05160 | 0.792 | 0.84 | Cldn11|1 | 1 | 160 | 85 | 8774 | Human Diseases | Infectious diseases: Viral |
| MicroRNAs in cancer | mmu05206 | 0.798 | 0.84 | Tgfb2|1;Zfpm2|1 | 2 | 303 | 85 | 8774 | Human Diseases | Cancers: Overview |
| Protein processing in endoplasmic reticulum | mmu04141 | 0.8 | 0.84 | Ubqln4|1 | 1 | 164 | 85 | 8774 | Genetic Information Processing | Folding, sorting and degradation |
| JAK-STAT signaling pathway | mmu04630 | 0.802 | 0.84 | Spred2|1 | 1 | 165 | 85 | 8774 | - | - |
| Herpes simplex virus 1 infection | mmu05168 | 0.803 | 0.84 | H2-D1|1;Fos|1;Jun|1 | 3 | 437 | 85 | 8774 | - | - |
| Tight junction | mmu04530 | 0.804 | 0.84 | Cldn11|1 | 1 | 166 | 85 | 8774 | Cellular Processes | Cellular community |
| Influenza A | mmu05164 | 0.804 | 0.84 | Jun|1 | 1 | 166 | 85 | 8774 | Human Diseases | Infectious diseases: Viral |
| Phagosome | mmu04145 | 0.83 | 0.861 | H2-D1|1 | 1 | 180 | 85 | 8774 | Cellular Processes | Transport and catabolism |
| Focal adhesion | mmu04510 | 0.862 | 0.889 | Jun|1 | 1 | 201 | 85 | 8774 | Cellular Processes | Cellular community |
| Proteoglycans in cancer | mmu05205 | 0.867 | 0.889 | Tgfb2|1 | 1 | 205 | 85 | 8774 | Human Diseases | Cancers: Overview |
| Metabolic pathways | mmu01100 | 0.908 | 0.925 | Ptgds|1;Phgdh|1;Mtm1|1;Dgkz|1;St6galnac5|1;Plcb1|1;Pole4|1;Dgkb|1;Dgat2|1;Dgkg|1;Ugt8|1 | 11 | 1555 | 85 | 8774 | Metabolism | Global and overview maps |
| Cytokine-cytokine receptor interaction | mmu04060 | 0.946 | 0.956 | Tgfb2|1 | 1 | 295 | 85 | 8774 | Environmental Information Processing | Signaling molecules and interaction |
| Huntington disease | mmu05016 | 0.95 | 0.956 | Plcb1|1 | 1 | 303 | 85 | 8774 | - | - |
| Olfactory transduction | mmu04740 | 1.00e+00 | 1.00e+00 | Pde1b|1;Gng7|1 | 2 | 1133 | 85 | 8774 | Organismal Systems | Sensory system |

Table S4：Supplementary-Striatum-Kegg

| **Pathway Name** | **Pathway ID** | **Pvalue** | **Pvalue_adjusted** | **Genes** | **Count** | **Pop Hit** | **List_Total** | **Background Genes** | **First class** | **Secondary class** |
| --- | --- | --- | --- | --- | --- | --- | --- | --- | --- | --- |
| Arrhythmogenic right ventricular cardiomyopathy (ARVC) | mmu05412 | 0.00327 | 0.0605 | Dsp|1;Slc8a1|1 | 2 | 77 | 10 | 8774 | - | - |
| GABAergic synapse | mmu04727 | 0.00434 | 0.0605 | Gabrb3|1;Gad2|1 | 2 | 89 | 10 | 8774 | Organismal Systems | Nervous system |
| Morphine addiction | mmu05032 | 0.00454 | 0.0605 | Gabrb3|1;Drd1|1 | 2 | 91 | 10 | 8774 | Human Diseases | Substance dependence |
| Taurine and hypotaurine metabolism | mmu00430 | 0.0125 | 0.125 | Gad2|1 | 1 | 11 | 10 | 8774 | Metabolism | Metabolism of other amino acids |
| Calcium signaling pathway | mmu04020 | 0.0191 | 0.153 | Drd1|1;Slc8a1|1 | 2 | 192 | 10 | 8774 | Environmental Information Processing | Signal transduction |
| Butanoate metabolism | mmu00650 | 0.0304 | 0.178 | Gad2|1 | 1 | 27 | 10 | 8774 | Metabolism | Carbohydrate metabolism |
| beta-Alanine metabolism | mmu00410 | 0.0359 | 0.178 | Gad2|1 | 1 | 32 | 10 | 8774 | Metabolism | Metabolism of other amino acids |
| Alanine, aspartate and glutamate metabolism | mmu00250 | 0.0425 | 0.178 | Gad2|1 | 1 | 38 | 10 | 8774 | Metabolism | Amino acid metabolism |
| Nicotine addiction | mmu05033 | 0.0447 | 0.178 | Gabrb3|1 | 1 | 40 | 10 | 8774 | Human Diseases | Substance dependence |
| Cocaine addiction | mmu05030 | 0.0534 | 0.178 | Drd1|1 | 1 | 48 | 10 | 8774 | Human Diseases | Substance dependence |
| Mineral absorption | mmu04978 | 0.0577 | 0.178 | Slc8a1|1 | 1 | 52 | 10 | 8774 | Organismal Systems | Digestive system |
| Neuroactive ligand-receptor interaction | mmu04080 | 0.0578 | 0.178 | Gabrb3|1;Drd1|1 | 2 | 350 | 10 | 8774 | Environmental Information Processing | Signaling molecules and interaction |
| Amyotrophic lateral sclerosis (ALS) | mmu05014 | 0.0642 | 0.178 | Slc1a2|1 | 1 | 58 | 10 | 8774 | - | - |
| Endocrine and other factor-regulated calcium reabsorption | mmu04961 | 0.0664 | 0.178 | Slc8a1|1 | 1 | 60 | 10 | 8774 | Organismal Systems | Excretory system |
| Amphetamine addiction | mmu05031 | 0.076 | 0.178 | Drd1|1 | 1 | 69 | 10 | 8774 | Human Diseases | Substance dependence |
| Type I diabetes mellitus | mmu04940 | 0.077 | 0.178 | Gad2|1 | 1 | 70 | 10 | 8774 | Human Diseases | Endocrine and metabolic disease |
| Gap junction | mmu04540 | 0.0939 | 0.178 | Drd1|1 | 1 | 86 | 10 | 8774 | Cellular Processes | Cellular community - eukaryotes |
| Cardiac muscle contraction | mmu04260 | 0.0949 | 0.178 | Slc8a1|1 | 1 | 87 | 10 | 8774 | Organismal Systems | Circulatory system |
| Arachidonic acid metabolism | mmu00590 | 0.097 | 0.178 | Ptgds|1 | 1 | 89 | 10 | 8774 | Metabolism | Lipid metabolism |
| Fc gamma R-mediated phagocytosis | mmu04666 | 0.097 | 0.178 | Gsn|1 | 1 | 89 | 10 | 8774 | Organismal Systems | Immune system |
| Hypertrophic cardiomyopathy (HCM) | mmu05410 | 0.0991 | 0.178 | Slc8a1|1 | 1 | 91 | 10 | 8774 | - | - |
| Protein digestion and absorption | mmu04974 | 0.102 | 0.178 | Slc8a1|1 | 1 | 94 | 10 | 8774 | Organismal Systems | Digestive system |
| Dilated cardiomyopathy (DCM) | mmu05414 | 0.102 | 0.178 | Slc8a1|1 | 1 | 94 | 10 | 8774 | - | - |
| Glutamatergic synapse | mmu04724 | 0.122 | 0.203 | Slc1a2|1 | 1 | 113 | 10 | 8774 | Organismal Systems | Nervous system |
| Oocyte meiosis | mmu04114 | 0.128 | 0.203 | Pttg1|1 | 1 | 119 | 10 | 8774 | Cellular Processes | Cell growth and death |
| Cell cycle | mmu04110 | 0.132 | 0.203 | Pttg1|1 | 1 | 123 | 10 | 8774 | Cellular Processes | Cell growth and death |
| Serotonergic synapse | mmu04726 | 0.14 | 0.205 | Gabrb3|1 | 1 | 131 | 10 | 8774 | Organismal Systems | Nervous system |
| Dopaminergic synapse | mmu04728 | 0.144 | 0.205 | Drd1|1 | 1 | 135 | 10 | 8774 | Organismal Systems | Nervous system |
| Retrograde endocannabinoid signaling | mmu04723 | 0.157 | 0.214 | Gabrb3|1 | 1 | 148 | 10 | 8774 | Organismal Systems | Nervous system |
| Adrenergic signaling in cardiomyocytes | mmu04261 | 0.16 | 0.214 | Slc8a1|1 | 1 | 152 | 10 | 8774 | Organismal Systems | Circulatory system |
| cGMP-PKG signaling pathway | mmu04022 | 0.181 | 0.233 | Slc8a1|1 | 1 | 173 | 10 | 8774 | Environmental Information Processing | Signal transduction |
| Alcoholism | mmu05034 | 0.207 | 0.259 | Drd1|1 | 1 | 201 | 10 | 8774 | Human Diseases | Substance dependence |
| cAMP signaling pathway | mmu04024 | 0.22 | 0.26 | Drd1|1 | 1 | 215 | 10 | 8774 | Environmental Information Processing | Signal transduction |
| Regulation of actin cytoskeleton | mmu04810 | 0.221 | 0.26 | Gsn|1 | 1 | 216 | 10 | 8774 | Cellular Processes | Cell motility |
| Viral carcinogenesis | mmu05203 | 0.233 | 0.267 | Gsn|1 | 1 | 230 | 10 | 8774 | Human Diseases | Cancer: overview |
| Human T-cell leukemia virus 1 infection | mmu05166 | 0.248 | 0.269 | Pttg1|1 | 1 | 246 | 10 | 8774 | Human Diseases | Infectious disease: viral |
| Parkinson disease | mmu05012 | 0.249 | 0.269 | Drd1|1 | 1 | 247 | 10 | 8774 | Human Diseases | Neurodegenerative disease |
| MicroRNAs in cancer | mmu05206 | 0.296 | 0.312 | Zeb2|1 | 1 | 303 | 10 | 8774 | Human Diseases | Cancer: overview |
| Metabolic pathways | mmu01100 | 0.552 | 0.566 | Gad2|1;Ptgds|1 | 2 | 1555 | 10 | 8774 | Metabolism | Global and overview maps |
| Olfactory transduction | mmu04740 | 0.749 | 0.749 | Slc8a1|1 | 1 | 1133 | 10 | 8774 | Organismal Systems | Sensory system |
